# Supplementary material for: Evaluation of Surfactants on Graphene Dispersion and Thermal Performance for Heat Dissipation Coating
Source: MDPI journal article supplement (doi:10.3390/polym14050952), 2022-02-27
Supplement: s1 [file s1]

## Supplementary Data

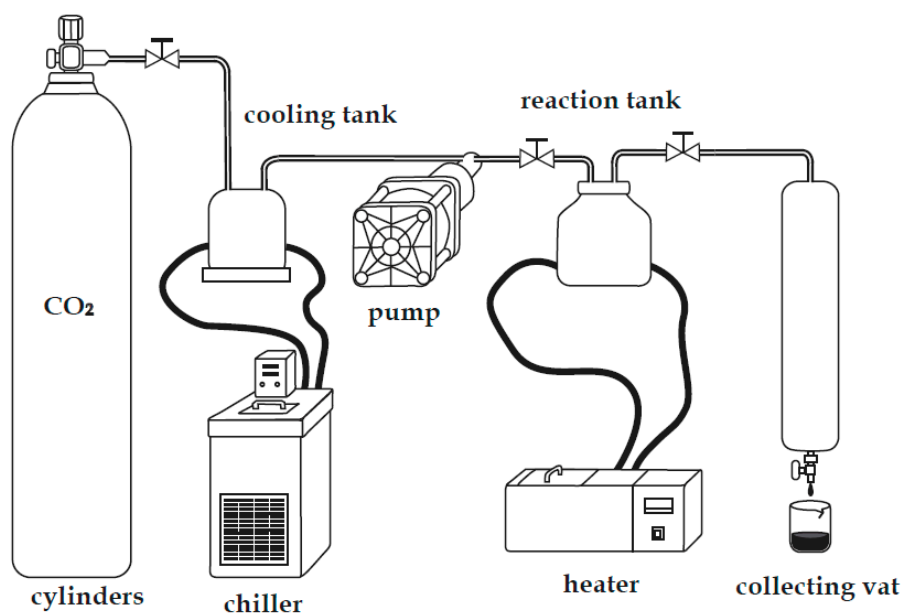

**Figure S1.** Schematic of the supercritical CO<sub>2</sub> processing system for exfoliating graphene flakes.

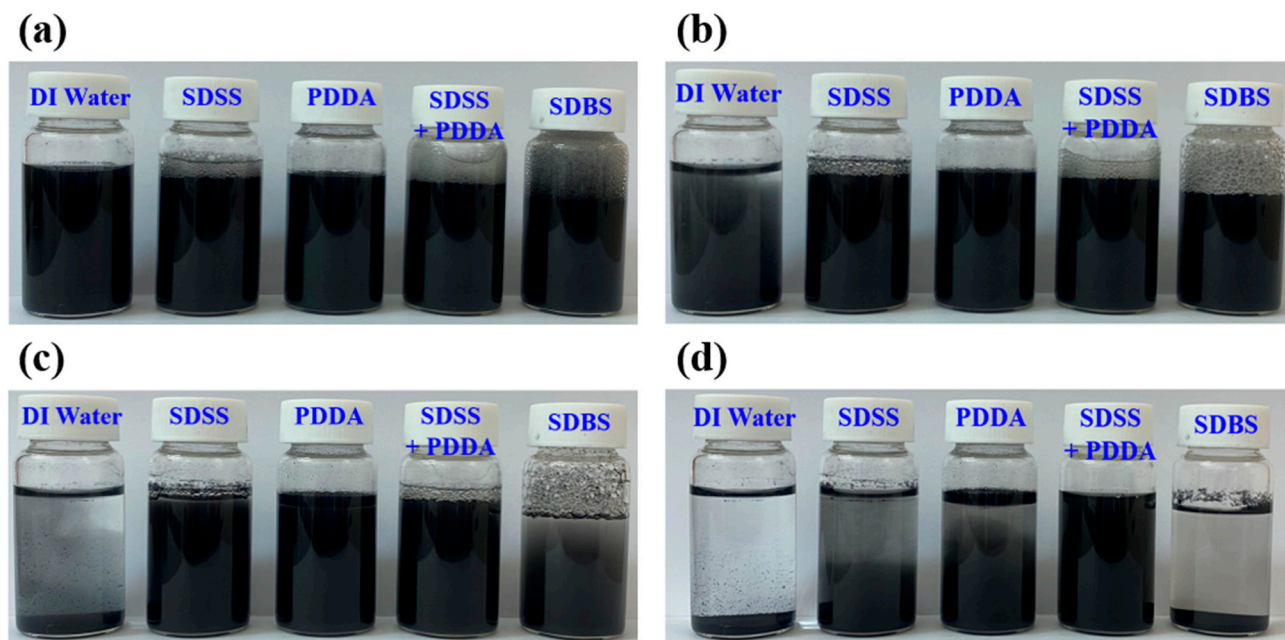

**Figure S2.** Graphene aqueous suspensions prepared using various surfactants. (a) Initial. (b) 1 hr. (c) 12 hr. (d) 3 days.

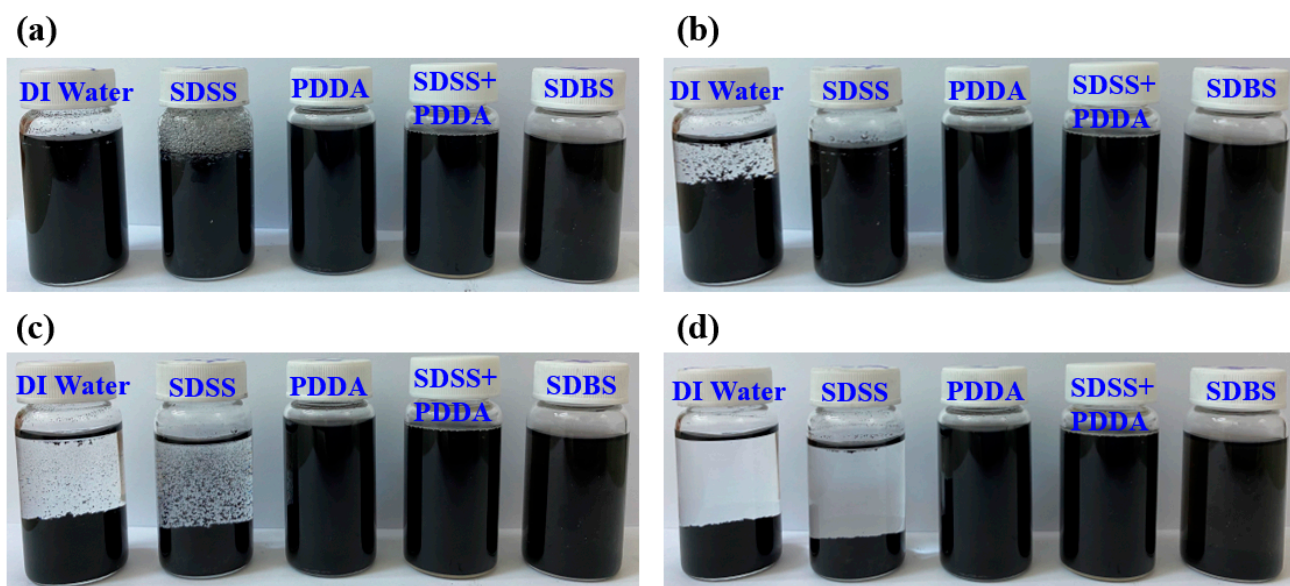

**Figure S3.** CNT aqueous suspensions prepared using various surfactants. (a) Initial. (b) 3 min. (c) 10 min. (d) 3 days.

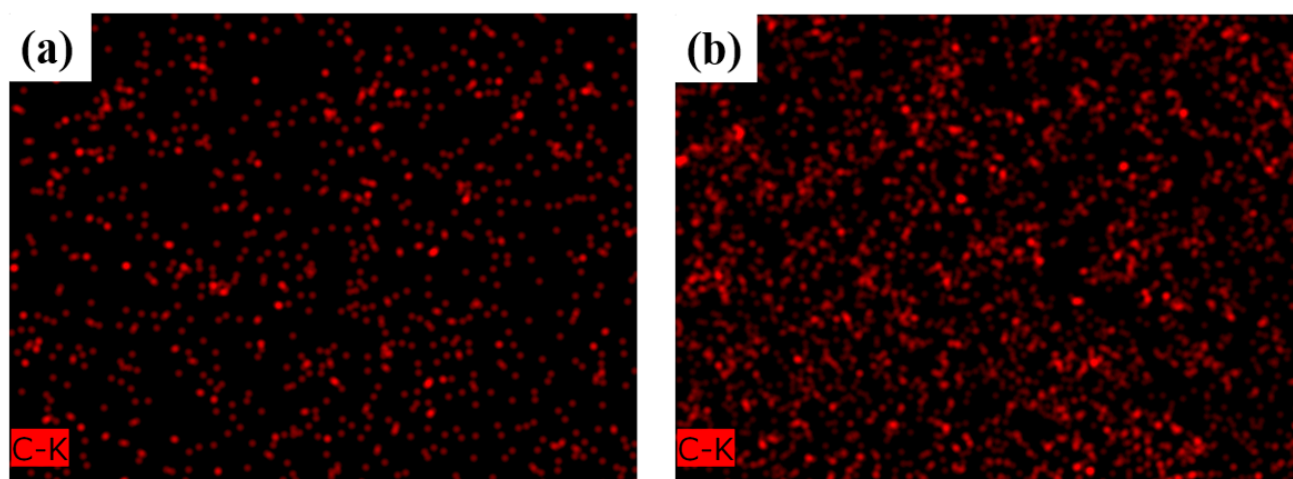

**Figure S4.** EDS images of the heat dissipation coatings: (a) with deionized water only, (b) with dispersant.

**Table S1.** Linear regression analysis of heating curve.

|             | Copper<br>bare panel | 4 wt% C<br>materials + water | 4 wt% C materials<br>+ dispersion | Al <sub>2</sub> O <sub>3</sub> + 4 wt% C<br>materials + dispersion |
|-------------|----------------------|------------------------------|-----------------------------------|--------------------------------------------------------------------|
| 0-15<br>min | 5.412                | 5.099                        | 5.086                             | 4.98                                                               |
| 0-30<br>min | 3.1                  | 2.94                         | 2.89                              | 2.68                                                               |
